# Supplementary material for: Climate Change Projections of Aridity Conditions in the Iberian Peninsula
Source: MDPI journal article supplement (doi:10.3390/w13152035), 2021-07-26
Supplement: s1 [file s1]

Archive with 1 entries (1 files):
- water-1287731-supplementary.pdf
